# Supplementary material for: Genetic analysis of Thai cattle reveals a Southeast Asian indicine ancestry
Source: PeerJ journal article supplement (doi:10.7717/peerj.1318), 2015-10-27

**A**

All breeds

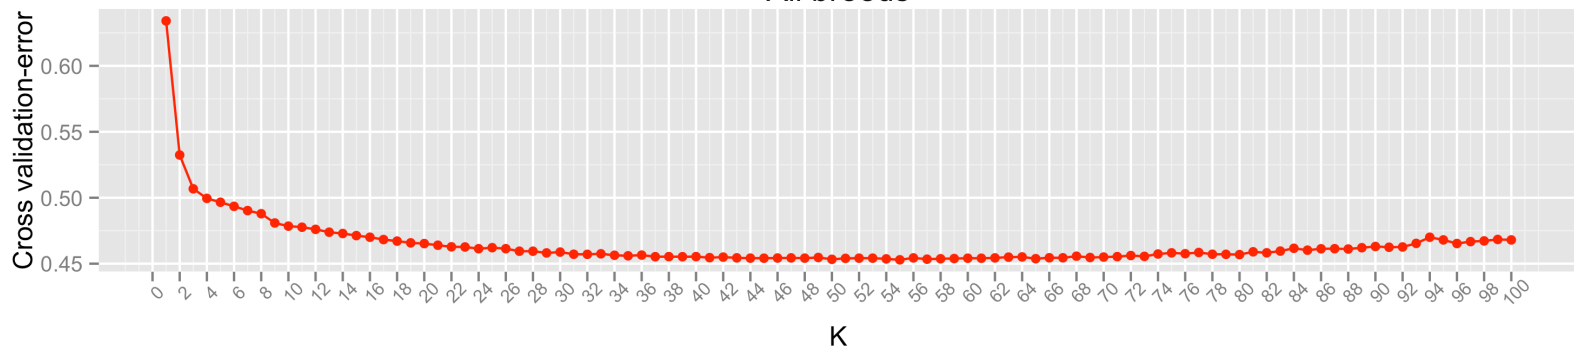**B**

Only indicine breeds

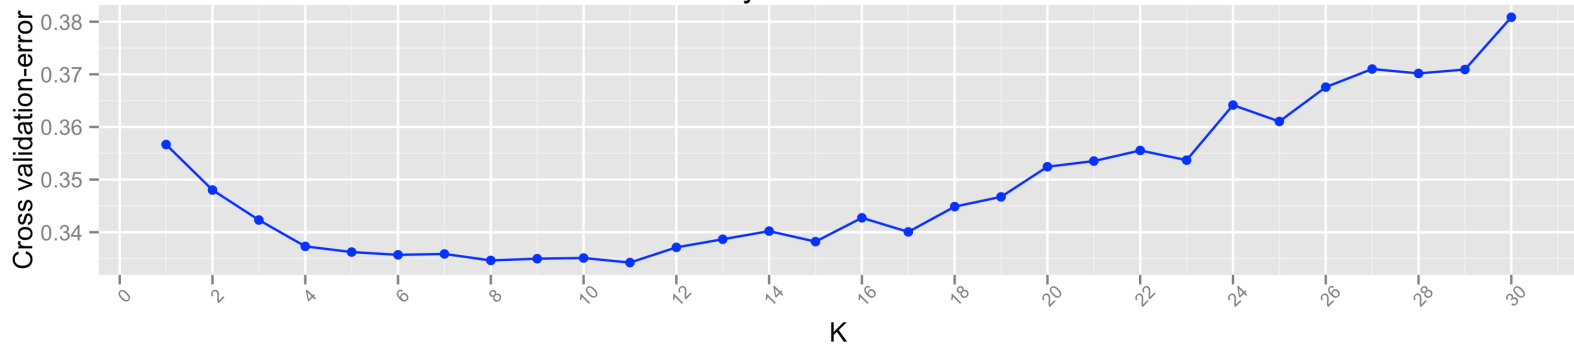**C**

indicine + 1 Thai

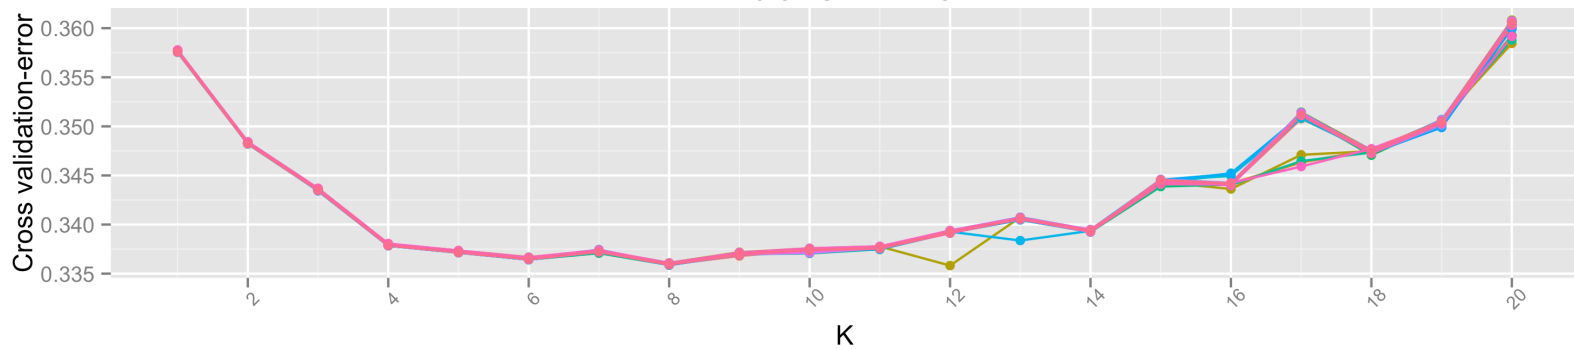

Supplement: S6__Figure.pdf [file S6__Figure.pdf]
