# Supplementary material for: Genetic analysis of Thai cattle reveals a Southeast Asian indicine ancestry
Source: PeerJ. 2015 Oct 27;3:e1318. doi: 10.7717/peerj.1318 (PMC4627918; doi:10.7717/peerj.1318)
Supplement: Table S2 — Measured concentration of purified DNA from 28 samples of Thai cattle. [file peerj-03-1318-s002.xlsx]

## Sheet: Tissue
Source	Sample_ID	NANODROP_conc_ng/ul
THC	THC_062	45.19
THC	THC_063	105.55
THC	THC_066	44.37
THC	THC_071	67.32
THC	THC_077	80.5
THR	THR_207	18.58
THR	THR_209	35.42
THR	THR_214	47.01
THR	THR_215	57.52
THR	THR_216	51.9
THR	THR_217	51.34
THR	THR_219	41.95
THR	THR_221	216.68
THS	THS_116	66.95
THS	THS_117	64.95
THS	THS_118	69.47
THS	THS_119	108.16
THS	THS_123	76.68

## Sheet: Blood
Source	Sample_ID	NANODROP_conc_ng/ul
THNE	THNE_002	411.3
THNE	THNE_006	283.01
THNE	THNE_007	160.82
THNE	THNE_014	452.54
THNE	THNE_025	336.13
THNE	THNE_035	511.76
THNE	THNE_044	341.67
THNE	THNE_046	496.89
THNE	THNE_047	284.93
THNE	THNE_048	211.66
