# Supplementary material for: Genetic analysis of Thai cattle reveals a Southeast Asian indicine ancestry
Source: PeerJ. 2015 Oct 27;3:e1318. doi: 10.7717/peerj.1318 (PMC4627918; doi:10.7717/peerj.1318)
Supplement: Table S4 — The table consists of subpopulations (SP1-96) with breed label information of assigned individuals. The corresponding bootstrapping assignment confidence number obtained from 100 bootstrap replicates are shown. [file peerj-03-1318-s005.xls]

## Sheet: Sheet1
Subpopulations	Individual assignment	Bootstrapping confidence
SP1	BAO(1) ND1(4)	0.604	L
SP2	NDAM(6) ND1(10)	0.82625	M
SP3	NDAM(14)	0.844286	M
SP4	ND2(7)	1	H
SP5	ND2(10)	1	H
SP6	LAG(20)	1	H
SP7	BAO(8)	1	H
SP8	SOM(18)	0.996667	H
SP9	BAO(7)	1	H
SP10	TG(8) AB(8) ASY(8) SAR(8) EAR(8) MG(5)	0.738	L
SP11	CANC(20) BALI(1)	0.99619	H
SP12	WAGY(12)	0.998333	H
SP13	HANW(6)	1	H
SP14	CHIA(8)	0.915	M
SP15	RMG(20)	1	H
SP16	ROMO(8)	0.39	L
SP17	TXLH(6) CRK(1)	0.905714	M
SP18	TXLH(14)	0.994286	H
SP19	SENP(14)	1	H
SP20	OUL(10)	0.995	H
SP21	OUL(9)	1	H
SP22	JER(20)	0.9915	H
SP23	GNS(5)	1	H
SP24	GNS(15)	1	H
SP25	BPN(7)	0.97	H
SP26	BPN(11)	0.969091	H
SP27	CRK(8)	0.9925	H
SP28	NORM(6)	1	H
SP29	NORM(7)	1	H
SP30	NORM(7)	1	H
SP31	MONT(20)	0.998	H
SP32	TAR(18)	1	H
SP33	ABO(20)	1	H
SP34	VOS(20)	0.7895	L
SP35	SIM(20)	1	H
SP36	GEL(6)	0.935	M
SP37	GEL(14)	0.958571	H
SP38	BSW(20)	1	H
SP39	BRVH(19)	1	H
SP40	BRVH(1) PIED(20) AYR(1)	0.965	H
SP41	MAR(7)	0.898571	M
SP42	MAR(12)	0.9	M
SP43	CHA(11)	0.986364	H
SP44	CHA(6)	0.99	H
SP45	AUB(20)	0.99	H
SP46	SAL(20)	0.9895	H
SP47	LM(20)	0.99	H
SP48	GAS(20)	1	H
SP49	SCHL(8)	1	H
SP50	AYR(17)	0.999412	H
SP51	CHIA(1) NRC(20)	0.961905	H
SP52	HO(3) PRP(20)	0.994783	H
SP53	SENP(5) HO(17)	1	H
SP54	BEFM(20)	1	H
SP55	HFD(10)	1	H
SP56	HFD(10)	1	H
SP57	ANR(18)	0.982222	H
SP58	AN(20) ANR(1)	1	H
SP59	SH(4) MSH(8)	0.970833	H
SP60	SH(13) MSH(1)	0.985	H
SP61	LINC(9)	0.448889	L
SP62	MAAN(20)	0.996	H
SP63	SGT(17)	0.968235	H
SP64	ZMA(20)	1	H
SP65	ONG(3) LX(5)	0.72375	L
SP66	ZFU(10) ZBO(20)	0.895333	M
SP67	ZFU(10)	0.694	L
SP68	BORG(15)	0.986667	H
SP69	BORG(5)	1	H
SP70	KUR(17)	0.962353	H
SP71	SHK(14)	1	H
SP72	ZEB(20)	1	H
SP73	BOR(20)	1	H
SP74	HAR(8) HIS(1)	1	H
SP75	NEL(20)	0.97	H
SP76	BR(15)	0.968	H
SP77	BR(5) GIR(20)	0.8884	M
SP78	CHO(10)	0.6	L
SP79	SAHW(17) RSIN(2) GBI(4) HIS(1)	0.996667	H
SP80	BAG(7)	0.485714	L
SP81	KAN(6)	0.95	H
SP82	DHA(7) LOH(5) THA(7) RSIN(5) ACH(4)	0.855357	M
SP83	ACH(6) GBI(2)	0.40625	L
SP84	DAJ(2) HIS(4)	0.68	L
SP85	THA(5) RSIN(1) HAR(2) KAN(4)	0.436667	L
SP86	CHO(1) DHA(5) LOH(5) RSIN(2) ACH(2) ONG(1) BAG(3) DAJ(6) GBI(4) HIS(4) ROJ(7)	0.493	L
SP87	DAJ(2) ROJ(3)	0.406	L
SP88	THC(5) THNE(3) THR(8)	0.743684	L
SP89	THS(5)	0.98875	H
SP90	THNE(7)	1	H
SP91	ACE(12)	0.875714	M
SP92	PES(6)	0.68	L
SP93	ONG(1) BALI(1) MAD(7) BRE(7)	0.99125	H
SP94	ONG(12)	0.570769	L
SP95	OBB(4)	1	H
SP96	BALI(18)	0.999444	H
